# Supplementary material for: Electronic structures and photovoltaic applications of vdW heterostructures based on Janus group-IV monochalcogenides: insights from first-principles calculations
Source: Royal Society of Chemistry journal article supplement (doi:10.1039/d2cp05663a), 2023-01-01
Supplement: d2cp05663a1.pdf [file d2cp05663a1.pdf]

*Electronic supplementary information for*

**Electronic structures and photovoltaic application of vdW heterostructure  
based-on Janus group-IV monochalcogenides: insight from first-principles  
calculations**

Kai Cheng,<sup>a,\*</sup> Wenbo Hu,<sup>a</sup> Xu Guo,<sup>a</sup> Lifan Wu,<sup>a</sup> Sandong Guo<sup>a</sup> and Yan Su,<sup>b,\*</sup>

<sup>a</sup>*School of Electronic Engineering, XI'AN University of Posts and Telecommunications, Xi'an 710121, China*

<sup>b</sup>*Key Laboratory of Materials Modification by Laser, Ion and Electron Beams (Dalian University of  
Technology), Ministry of Education, Dalian 116024, China*

\* Corresponding authors. E-mail address: [chengkai\\_xiyou@163.com](mailto:chengkai_xiyou@163.com) (K. Cheng) or [su.yan@dlut.edu.cn](mailto:su.yan@dlut.edu.cn) (Y. Su)

**Table S1.** The relaxed-ion elastic coefficients ( $C_{11}$ ,  $C_{12}$ ,  $C_{22}$ , and  $C_{44}$ ) of four Janus group-IV monochalcogenides.

|                     | $C_{11}$<br>(N/m) | $C_{22}$<br>(N/m) | $C_{12}$<br>(N/m) | $C_{44}$<br>(N/m) |
|---------------------|-------------------|-------------------|-------------------|-------------------|
| GeSnS <sub>2</sub>  | 39.58             | 15.43             | 18.29             | 18.21             |
| GeSnSe <sub>2</sub> | 42.18             | 20.66             | 18.66             | 19.46             |
| Ge <sub>2</sub> SSe | 45.02             | 15.27             | 19.88             | 20.88             |
| Sn <sub>2</sub> SSe | 40.81             | 20.88             | 18.15             | 19.04             |

**Table S2.** Information of all 32 heterostructures: mismatch along zig-zag and air-chair direction ( $\Delta_{\text{mis}}$ ), band alignment at Anderson limit calculated with HSE06 functional, and power conversion efficiency of type II heterostructures.

|                              | $\Delta_{\text{mis}}(\%)$ |           | Type | PCE(%) |
|------------------------------|---------------------------|-----------|------|--------|
|                              | Zig-zag                   | Arm-chair |      |        |
| GeSe/GeSnS <sub>2</sub> -Ge  | 2.87                      | 2.94      | II   | 18.07  |
| GeSe/GeSnS <sub>2</sub> -Sn  |                           |           | I    | -      |
| GeSe/GeSnSe <sub>2</sub> -Ge | 3.28                      | 3.59      | II   | 16.72  |
| GeSe/GeSnSe <sub>2</sub> -Sn |                           |           | II   | 20.86  |
| GeSe/Ge <sub>2</sub> SSe-S   | 3.52                      | 1.91      | I    | -      |
| GeSe/Ge <sub>2</sub> SSe-Se  |                           |           | I    | -      |
| GeSe/Sn <sub>2</sub> SSe-S   | 4.75                      | 2.90      | II   | 19.19  |
| GeSe/Sn <sub>2</sub> SSe-Se  |                           |           | II   | 19.81  |
| SnS/GeSnS <sub>2</sub> -Ge   | 4.96                      | 1.82      | II   | 11.86  |
| SnS/GeSnS <sub>2</sub> -Sn   |                           |           | I    | -      |
| SnS/GeSnSe <sub>2</sub> -Ge  | 1.20                      | 2.46      | II   | 11.20  |
| SnS/GeSnSe <sub>2</sub> -Sn  |                           |           | I    | -      |
| SnS/Sn <sub>2</sub> SSe-S    | 2.66                      | 1.77      | I    | -      |
| SnS/Sn <sub>2</sub> SSe-Se   |                           |           | I    | -      |
| SnSe/GeSnSe <sub>2</sub> -Ge | 3.99                      | 0.52      | II   | 16.40  |
| SnSe/GeSnSe <sub>2</sub> -Sn |                           |           | I    | -      |
| SnSe/Sn <sub>2</sub> SSe-S   | 2.53                      | 0.16      | I    | -      |
| SnSe/Sn <sub>2</sub> SSe-Se  |                           |           | I    | -      |
| GeS/GeSnS <sub>2</sub> -Ge   | 5.92                      | 2.75      | I    | -      |
| GeS/GeSnS <sub>2</sub> -Sn   |                           |           | II   | 15.86  |
| GeS/GeSnSe <sub>2</sub> -Ge  | 12.06                     | 2.11      | I    | -      |
| GeS/GeSnSe <sub>2</sub> -Sn  |                           |           | I    | -      |
| GeS/Ge <sub>2</sub> SSe-S    | 5.28                      | 3.78      | II   | 17.48  |
| GeS/Ge <sub>2</sub> SSe-Se   |                           |           | II   | 17.88  |
| GeS/Sn <sub>2</sub> SSe-S    | 13.53                     | 2.79      | II   | 20.72  |
| GeS/Sn <sub>2</sub> SSe-Se   |                           |           | II   | 21.31  |
| SnS/Ge <sub>2</sub> SSe-S    | 5.60                      | 0.78      | I    | -      |
| SnS/Ge <sub>2</sub> SSe-Se   |                           |           | II   | 16.74  |
| SnSe/GeSnS <sub>2</sub> -Ge  | 10.14                     | 0.11      | II   | 18.47  |
| SnSe/GeSnS <sub>2</sub> -Sn  |                           |           | I    | -      |
| SnSe/Ge <sub>2</sub> SSe-S   | 10.78                     | 1.15      | I    | -      |
| SnSe/Ge <sub>2</sub> SSe-Se  |                           |           | I    | -      |

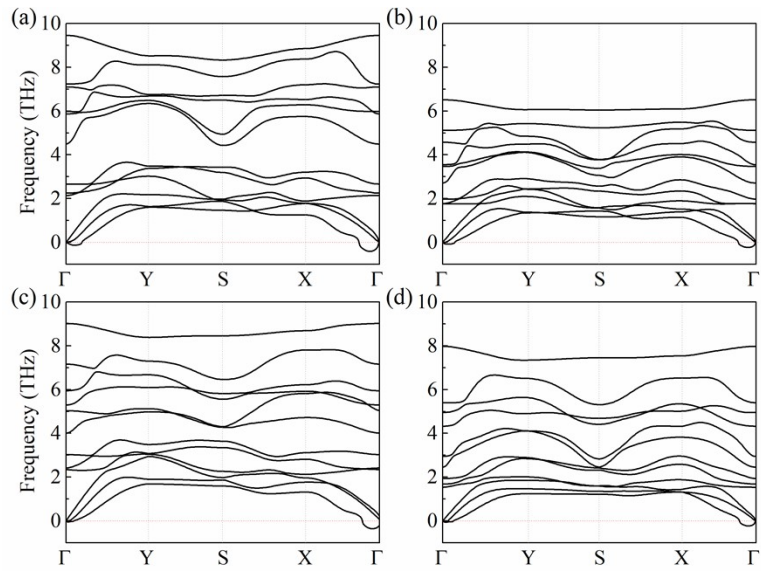

**Fig. S1** Phonon dispersions of Janus (a)  $\text{GeSnS}_2$ , (b)  $\text{GeSnSe}_2$ , (c)  $\text{Ge}_2\text{SSe}$ , and (d)  $\text{Sn}_2\text{SSe}$ .

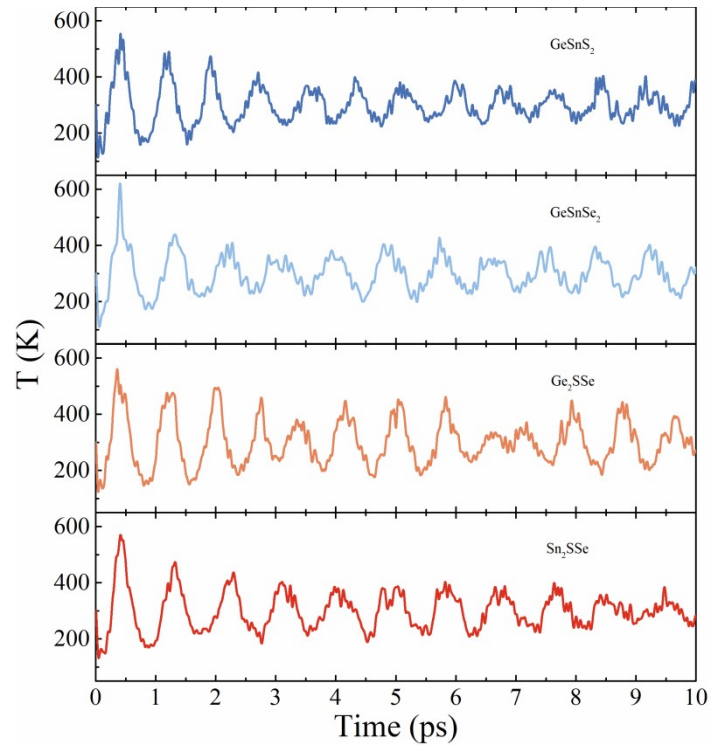

**Fig. S2** Time evolution of temperature at each Janus group-IV monochalcogenides.

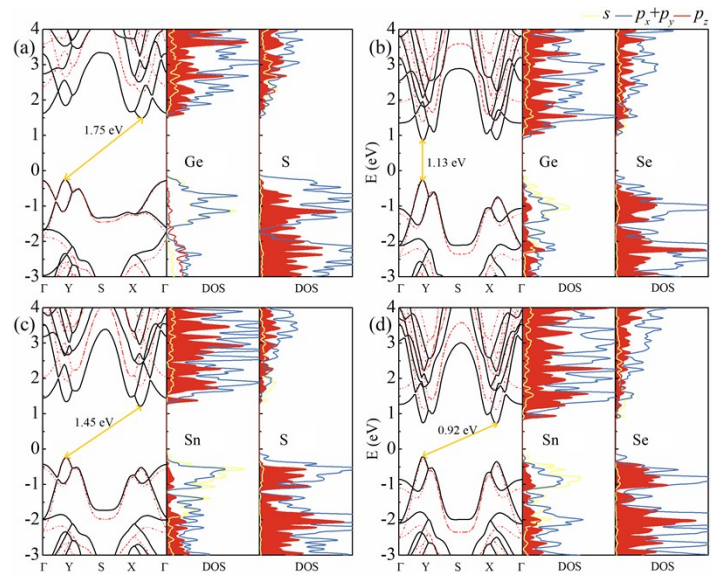

**Fig. S3** Electronic band structures and partial density of states (DOS) of (a) GeS, (b) GeSe, (c) SnSe, and (d) SnSe. The black plots and the red dashed plots are calculated with PBE and HSE06 functional, respectively.

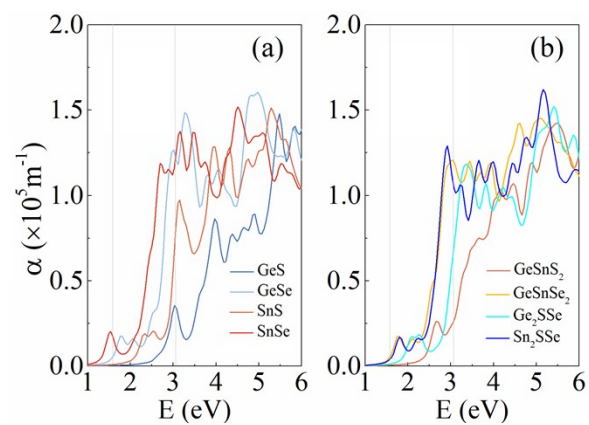

**Fig. S4** Optical absorption spectrum of (a) pristine and (b) Janus group-IV monochalcogenides calculated with HSE06 functional. The two grey dashed lines denote the visible light region.

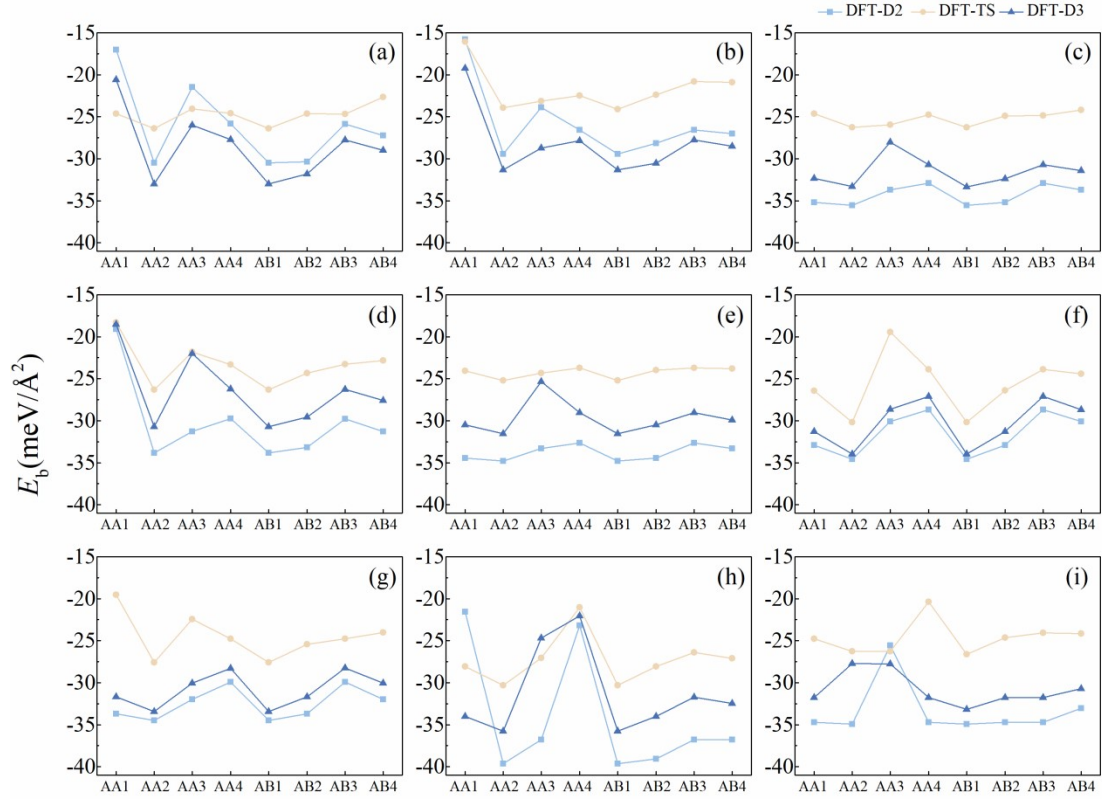

**Fig. S5** Binding energy of eight stacking configurations at (a) GeSe/GeSnS<sub>2</sub>-Ge, (b) GeSe/GeSnSe<sub>2</sub>-Ge, (c) GeSe/GeSnSe<sub>2</sub>-Sn, (d) GeSe/Sn<sub>2</sub>SSe-S, (e) GeSe/Sn<sub>2</sub>SSe-Se, (f) SnS/GeSnS<sub>2</sub>-Ge, (g) SnS/GeSnSe<sub>2</sub>-Ge, (h) SnS/GeSnSe<sub>2</sub>-Sn and (i) SnSe/GeSnSe<sub>2</sub>-Ge heterostructure calculated with DFT-D2, DFT-TS and DFT-D3 vdW dispersion correction.



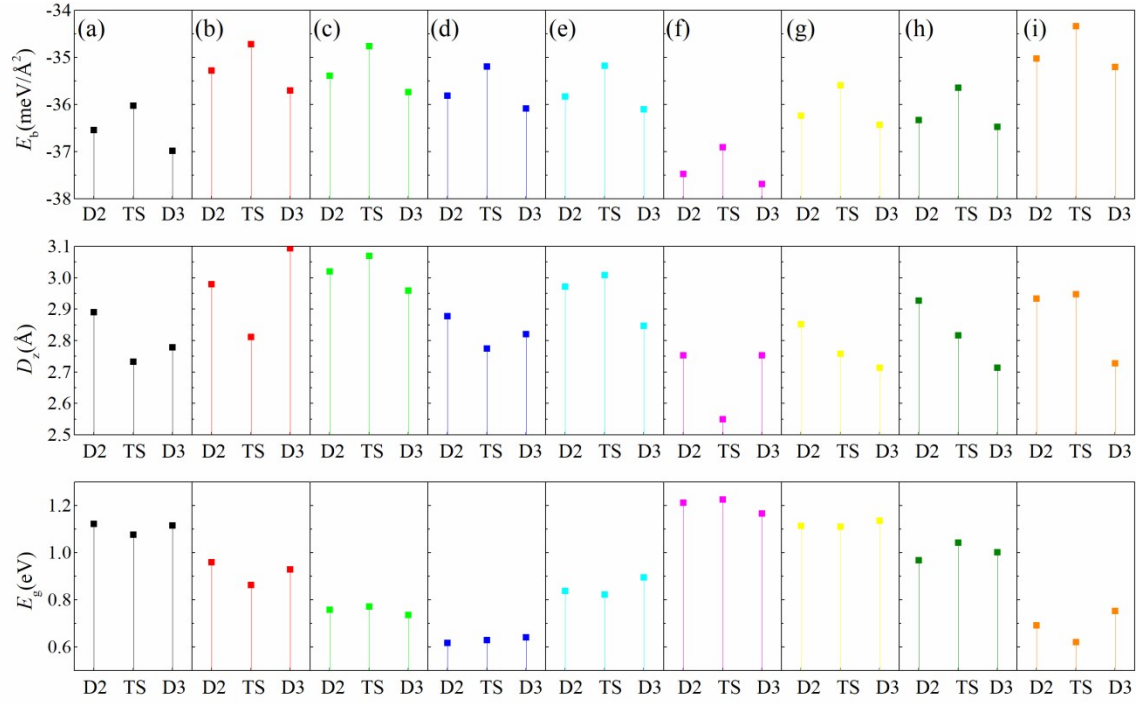

**Fig. S6** Binding energy (upper), average vertical distance (middle), and band gap (lower) at (a) GeSe/GeSnS<sub>2</sub>-Ge, (b) GeSe/GeSnSe<sub>2</sub>-Ge, (c) GeSe/GeSnSe<sub>2</sub>-Sn, (d) GeSe/Sn<sub>2</sub>SSe-S, (e) GeSe/Sn<sub>2</sub>SSe-Se, (f) SnS/GeSnS<sub>2</sub>-Ge, (g) SnS/GeSnSe<sub>2</sub>-Ge, (h) SnS/GeSnSe<sub>2</sub>-Sn, and (i) SnSe/GeSnSe<sub>2</sub>-Ge heterostructure of AB1 stacking configuration calculated with DFT-D2, DFT-TS, and DFT-D3 vdW dispersion correction.

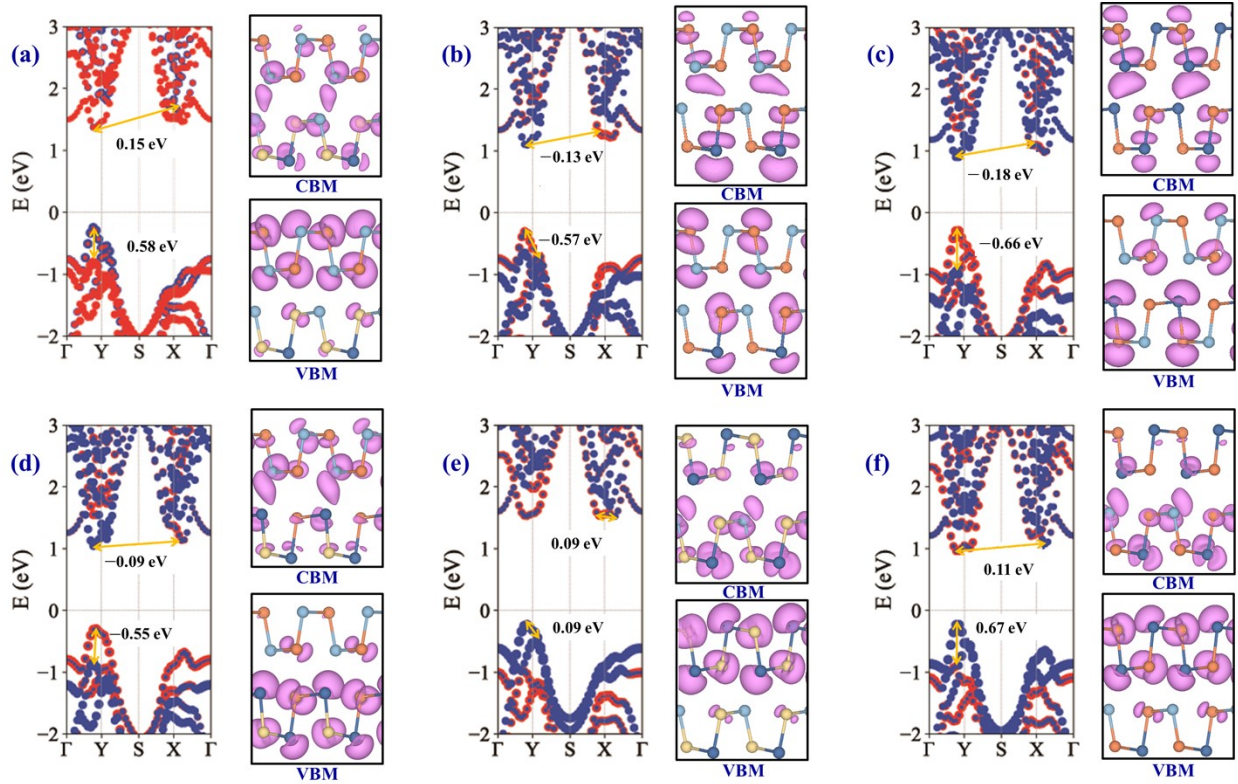

**Fig. S7** Projected electronic band structures (left panel), the partial charge density of VBM (right lower panel) and CBM (right upper panel) of (a) GeSe/GeSnS<sub>2</sub>-Ge, (b) GeSe/GeSnSe<sub>2</sub>-Ge, (c) GeSe/GeSnSe<sub>2</sub>-Sn, (d) GeSe/Sn<sub>2</sub>SSe-Se, (e) SnS/GeSnS<sub>2</sub>-Ge and (f) SnSe/GeSnSe<sub>2</sub>-Ge calculated from HSE06 functional. At the left panel, the blue and red plots indicate the contribution from pristine and Janus monochalcogenides, respectively, and the width is proportional to the weight. The upper number is the CBO, and the lower number is the VBO. At the right panel, the isosurface of partial charge density is 0.004 e/Born<sup>3</sup>.
